# Supplementary material for: Allele-specific locus binding and genome editing by CRISPR at the p16INK4a locus
Source: PubMed Central journal article supplement (PMC4964623; doi:10.1038/srep30485), 2016-07-28
Supplement: srep30485-s1.pdf [file srep30485-s1.pdf]

**Supplementary Information**

**Allele-specific locus binding and genome editing by CRISPR at the  
*p16INK4a* locus**

Toshitsugu Fujita, Miyuki Yuno, and Hodaka Fujii

## Supplementary Figure Legends

### Supplementary Figure S1. Genome editing by CRISPR *in vivo*. (a–c) (Left panel)

Schemes for genome editing by CRISPR, and primer positions for genotyping PCR.

Wild-type HCT116 (a and c) or HCT116/del#3 (b), a HCT116-derived cell line, was used.

Details of HCT116/del#3 are shown in Supplementary Figure S2. (Right panel) Genotyping PCR for confirmation of homologous recombination introduced by CRISPR. M: DNA size marker. Products of genotyping PCR were cloned, and independent clones were subjected to DNA sequencing analysis to identify targeted alleles. Results are shown in Figure 2c.

### Supplementary Figure S2. Introduction of indels in the *p16INK4a* locus using CRISPR.

(a) Experimental scheme for introduction of CRISPR-mediated indels in the *p16INK4a* locus in HCT116, and primer positions for genotyping PCR. (b) Confirmation of the indel.

Genomic DNA was subjected to genotyping PCR. PCR products of clone #3 (arrows) were subjected to DNA sequencing analysis to identify the indel. WT: parental HCT116; M: DNA size marker. (c) Deletion mutation identified in the Gx5 allele in clone #3 (referred to as HCT116/del#3 hereafter).

(d) Experimental scheme and primer positions for RT-PCR and bisulfite-PCR. (e) RT-PCR. Total RNA extracted from HCT116 or HCT116/del#3 was used

for RT-PCR. The RT-PCR product of HCT116/del#3 (arrow) was subjected to DNA

sequencing analysis to identify the transcribed *p16INK4a* allele. (f) Confirmation of Gx5

allele-specific transcription of the *p16INK4a* gene in HCT116/del#3. The DNA sequencing

trace of the RT-PCR product (arrow in e) is shown. (g) Bisulfite sequencing of genomic DNA

extracted from HCT116/del#3. The CpG methylation states of the target site for sgRNA\_mid2 (red square) are the same as those in the parental cell line HCT116.

**Supplementary Figure S3. Method for evaluation of locus binding of CRISPR *in vivo*. (a)**

Scheme for enChIP combined with bisulfite treatment followed by methylation-specific PCR (MSP). C: cytosine; U: uracil. **(b)** DNA sequence of the CpG island in the Gx4 allele. The primer positions for MSP are shown in pink (forward) and yellow (reverse). DNA sequences downstream of the CpG island are shown in gray. See also Figure 1b. **(c)** Validation of MSP. Genomic DNA extracted from 293T and HCT116 was subjected to bisulfite treatment followed by MSP. As a methylated DNA control, genomic DNA extracted from 293T was treated with CpG methyltransferase and subjected to bisulfite treatment followed by MSP.

**Supplementary Figure S4. Method for evaluation of binding of CRISPR to purified**

**DNA *in vitro*.** Scheme for *in vitro* enChIP combined with bisulfite treatment followed by methylation-specific PCR (MSP). C: cytosine; U: uracil.

**Supplementary Figure S5. Validation of MSP for evaluation of *p14ARF* locus binding by**

**CRISPR *in vivo*.** **(a)** A partial DNA sequence of the CpG island (CpG: 176) in the methylated allele of the *p14ARF* locus. The primer positions for methylation-specific PCR (MSP) are shown in pink (forward) and yellow (reverse). See also Figure 4b. **(b)** Validation of MSP. Genomic DNA extracted from 293T and HCT116 was subjected to bisulfite treatment followed by MSP. As a methylated DNA control, genomic DNA extracted from 293T was treated with CpG methyltransferase and subjected to bisulfite treatment followed by MSP.

**Supplementary Figure S6. Genome editing and locus binding using sgRNA\_Gx4. (a)**

DNA sequences targeted by sgRNA\_Gx4. PAMs are shown in green. The single-guanine insertion in the Gx5 allele is shown in red. **(b)** Potential modes of single-nucleotide skipping

at the 1- or 2-base 5' of the PAM to tolerate nucleotide mismatches. (c) Evaluation of genome editing. The scheme for genome editing and genotyping PCR is shown in Supplementary Figure S7. Products of genotyping PCR (Supplementary Fig. S7b) were cloned, and 15 independent clones were subjected to DNA sequencing analysis to identify the targeted alleles. (d) DNA yields of conventional enChIP. Error bars represents s.e.m. of three enChIP experiments.

**Supplementary Figure S7. Potential modes of single-nucleotide skipping. (a and b)**

Potential modes of single-nucleotide skipping at the third or seventh base 5' of the PAM to tolerate nucleotide mismatches: (a) sgRNA Gx4#2; (b) sgRNA Gx5#2. Single-nucleotide skipping might occur between the third and seventh bases 5' of the PAM. Single-nucleotide skipping at third or seventh base is shown as a representative. PAMs are shown in green. The single-guanine insertion in the Gx5 allele is shown in red.

**Supplementary Figure S8. Genome editing by CRISPR *in vivo*.** (a) Scheme for genome editing by CRISPR, and primer position for genotyping PCR. (b–d) Genotyping PCR for confirmation of homologous recombination introduced by CRISPR with sgRNA\_Gx4 (b), sgRNA\_Gx4#2 (c), or sgRNA\_Gx5#2 (d). M: DNA size marker. Products of genotyping PCR were cloned, and independent clones were subjected to DNA sequencing analysis to identify targeted alleles. The results are shown in Figure 4b or Supplementary Figure S5c.

**Supplementary Figure S9. An alternative PAM “cgg” for sgRNA\_Gx4#2 in the *p16INK4a* locus.** An alternative PAM is shown in green. The single-guanine insertion in the Gx5 allele is shown in red. In this model, 2-bp mismatches adjacent to the alternative PAM could be tolerated by CRISPR.

## **Supplementary Materials and Methods**

### **CpG methylation**

Genomic DNA (1  $\mu\text{g}$ ) of human kidney 293T cells was incubated with CpG methyltransferase (*M.SssI*) (New England Biolabs) at 37°C for 2 h. DNA was purified by phenol/chloroform extraction and subjected to bisulfite treatment.

### **Genome editing by CRISPR to establish cell lines**

HCT116 cells ( $4 \times 10^5$  cells) were transfected with 2  $\mu\text{g}$  each of Cas9 expression plasmid (Addgene#41815), sgRNA\_rig3 expression plasmid, and *p16INK4a* promoter-driven GFP expression plasmid using Lipofectamine 3000. Two days after transfection, GFP-positive cells were sorted as single cells and expanded independently. Indels were confirmed by PCR with KOD FX (Toyobo) followed by DNA sequencing analysis. HCT116 clone #3 (HCT116/del#3) was used in subsequent analyses.

### **RT-PCR**

Total RNA was extracted with Isogen II (Nippongene). RT-PCR was performed as described previously<sup>46</sup>, except that AmpliTaq Gold 360 Master Mix (Applied Biosystems) was used.

### Supplementary References

46. Fujita, T. & Fujii, H. Species-specific 5'-genomic structure and multiple transcription start sites in the chicken Pax5 gene. *Gene* **477**, 24–31 (2011).

**Table S1. Primers, ssDNA donors, and gRNAs used in this study**

| Number | Name                     | Sequence (5' → 3')                                                              | Experiments                                                                                                 | Categories  |
|--------|--------------------------|---------------------------------------------------------------------------------|-------------------------------------------------------------------------------------------------------------|-------------|
| 27677  | hCDKN2A-Bisul-CpG-free-F | TTTTTAGAGGATTTGAGGGATAGG                                                        | Bisulfite-PCR in Figure 1d and Supplementary Figure S2g                                                     | Primer      |
| 27678  | hCDKN2A-Bisul-CpG-free-R | CTACCTAATTCCAATTCCTACAACCTTC                                                    | Bisulfite-PCR in Figure 1d and Supplementary Figure S2g                                                     | Primer      |
| 27940  | hCDKN2A-Bisul-(M)-F2     | TTTAGGTGGGTAGAGGGTTGTAGC                                                        | MSP (Methylation) in Figures 2c, 3, and 5c, and Supplementary Figures S3c and S6d                           | Primer      |
| 27941  | hCDKN2A-Bisul-(M)-R2     | AAAAAACCTCCCTTTTCCGAA                                                           | MSP (Methylation) in Figures 2c, 3, and 5c, and Supplementary Figures S3c and S6d                           | Primer      |
| 27942  | hCDKN2A-Bisul-(U)-F2     | TTTAGGTGGGTAGAGGGTTGTAGTG                                                       | MSP (Unmethylation) in Figures 2c, 3, and 5c, and Supplementary Figures S3c and S6d                         | Primer      |
| 27943  | hCDKN2A-Bisul-(U)-R2     | CAAAAAACCTCCCTTTTCCAA                                                           | MSP (Unmethylation) in Figures 2c, 3, and 5c, and Supplementary Figures S3c and S6d                         | Primer      |
| 27889  | p16_GFP_KI-genotype-R    | GAAGAAGTCGTCTGCTTCATGT                                                          | Genotyping PCR in Supplementary Figures S1 and S8 (all sgRNAs)                                              | Primer      |
| 27789  | hCDKN2A-Gx4_Gx5-R2       | CTGCAAATTCGTCTCCAGAGT                                                           | Genotyping PCR in Supplementary Figure S1a (sgRNA_lef5)                                                     | Primer      |
| 27953  | p16_GFP_KI-genotype-R3   | TCTCGTGTTCATCAACCTCA                                                            | Genotyping PCR in Supplementary Figure S1b (sgRNA_mid2) and Figure S8 (sgRNA_Gx4, sgRNA_Gx4#2, sgRNA_Gx5#2) | Primer      |
| 27888  | p16_GFP_KI-genotype-F    | CAGTCCGACTCTCCAAAAGGAAT                                                         | Genotyping PCR in Supplementary Figure S1c (sgRNA_rig3)                                                     | Primer      |
| 27175  | hCDKN2A-Ex1-F            | ACTTCAGGGGTGCCACATTC                                                            | RT-PCR in Supplementary Figure S2e (p16INK4a)                                                               | Primer      |
| 27411  | hCDKN2A-Ex1_2-R          | CATCATCATGACCTGGATCG                                                            | RT-PCR in Supplementary Figure S2e (p16INK4a)                                                               | Primer      |
| 26460  | hGAPDH-Ex8_9-F           | TGATGACATCAAGAAGGTGGTGAAG                                                       | RT-PCR in Supplementary Figure S2e (GAPDH)                                                                  | Primer      |
| 26461  | hGAPDH-Ex8_9-R           | TCCTTGGAGGCCATGTGGGCCAT                                                         | RT-PCR in Supplementary Figure S2e (GAPDH)                                                                  | Primer      |
| 27952  | p16_GFP_HEJ-donor3       | GGGCTGGTGGTACCAGAGGGgaagaagtcgtctctcatgtcccGGCTGCGGAGAGGGGGAGAGC                | Donor_lef5 in Supplementary Figures S1a                                                                     | ssDNA donor |
| 27951  | p16_GFP_HEJ-donor2       | CTGACTGGTGGCCACGGCCGGCgaagaagtcgtctctcatgtcccGGGCGCTGTGGAGGCGGG                 | Donor_mid2 in Supplementary Figures S1b and S8                                                              | ssDNA donor |
| 27936  | p16_GFP_HEJ-donor        | TGCGGGCGCTGTGGAGGGGGGGCGTGCgaattcaatgaagcagcactctcCGGAGGCGATCCAGGTGGGTAGAGGGTCT | Donor_rig3 in Supplementary Figures S1c                                                                     | ssDNA donor |
| -      | hp16#236_258-crRNA-sp2   | UGGGGGCGACCCGUGCGUGUUUAGAGCUAUGCUGUUU                                           | crRNA for gRNA_lef5 in Figure 3                                                                             | gRNA        |
| -      | hp16#Gx5-crRNA-sp2       | CACCUCUCUACCCGACCCGUGUUUAGAGCUAUGCUGUUU                                         | crRNA for gRNA_mid2 in Figure 3                                                                             | gRNA        |
| -      | hp16#1-crRNA-sp2         | ACCGUAACUUAUCGUGCGUGUUUAGAGCUAUGCUGUUU                                          | crRNA for gRNA_rig3 in Figure 3                                                                             | gRNA        |
| -      | tracrRNA_15-89           | AACAGCAUAGCAAGUAAAAUAAAGGCUAGUCCGUUAUCAACUUGAAAAAGUGGCCAGCAGUCGUGUCUUUUUUU      | tracrRNA for gRNAs (all) in Figure 3                                                                        | gRNA        |
| 28012  | hp14ARF-Bisul-CpG-free-F | TTGTTTATTTTGGTGTAAAGGG                                                          | Bisulfite-PCR in Figure 4d                                                                                  | Primer      |
| 28013  | hp14ARF-Bisul-CpG-free-R | TTTCCTACCTAATCTCTAAAAAAC                                                        | Bisulfite-PCR in Figure 4d                                                                                  | Primer      |
| 28016  | hp14ARF-Bisul-(M)-F      | GTTTTCTGGTTTATATTTTCG                                                           | MSP (Methylation) in Figure 4e and Supplementary Figure S5                                                  | Primer      |
| 28017  | hp14ARF-Bisul-(M)-R      | TAAAAACGACTACTACCCTAAACG                                                        | MSP (Methylation) in Figure 4e and Supplementary Figure S5                                                  | Primer      |
| 28018  | hp14ARF-Bisul-(U)-F      | GGGTTTTGTGGTTTATATTTGTG                                                         | MSP (Unmethylation) in Figure 4e and Supplementary Figure S5                                                | Primer      |
| 28019  | hp14ARF-Bisul-(U)-R      | AAAAACAACACTACCCTAAACACT                                                        | MSP (Unmethylation) in Figure 4e and Supplementary Figure S5                                                | Primer      |

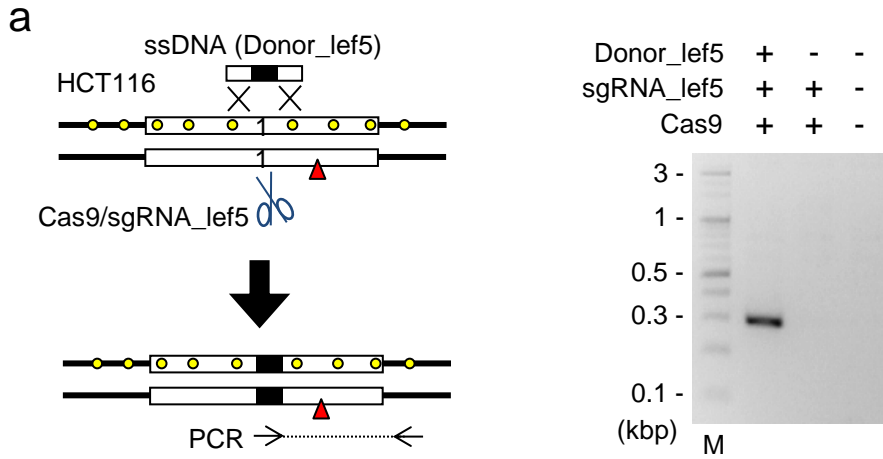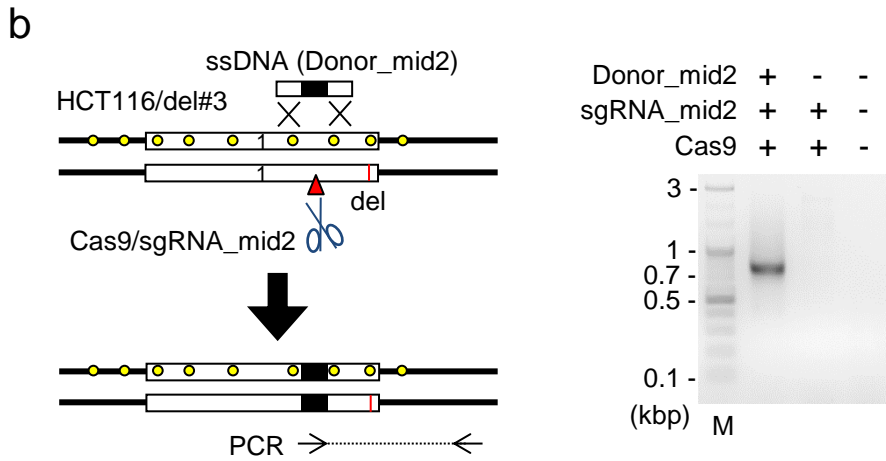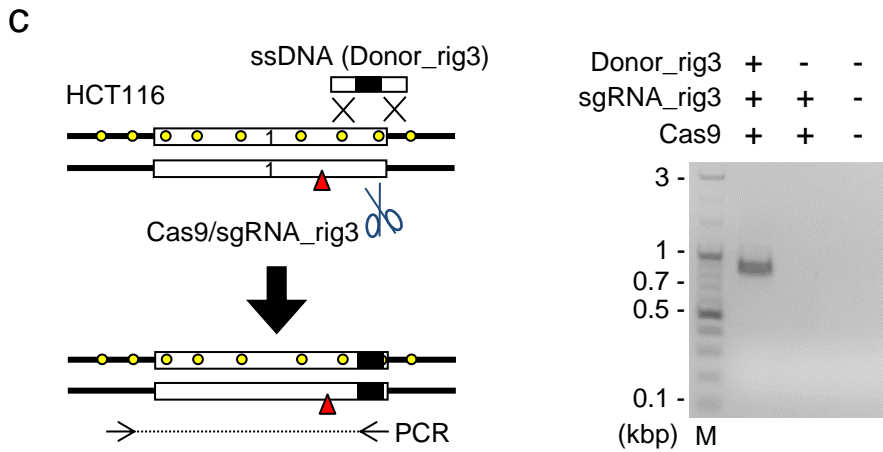

Supplementary Figure S1



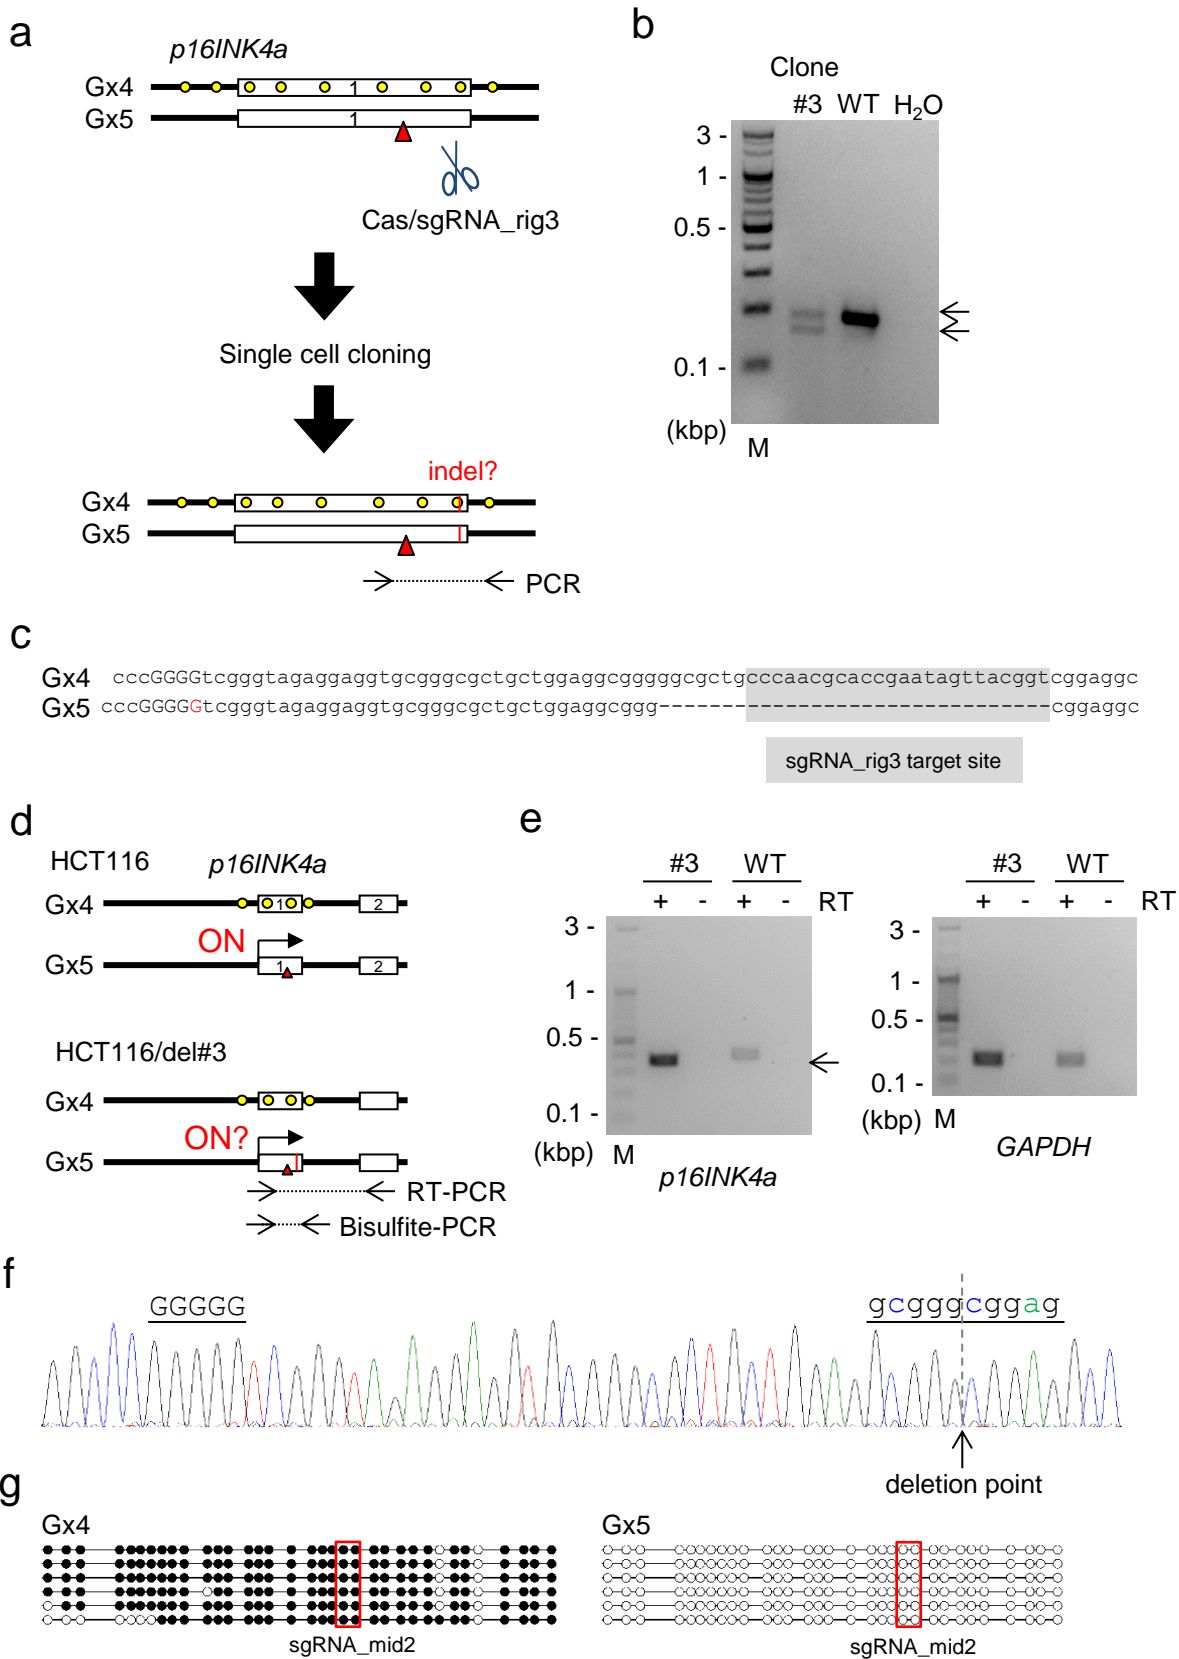

Supplementary Figure S2

a

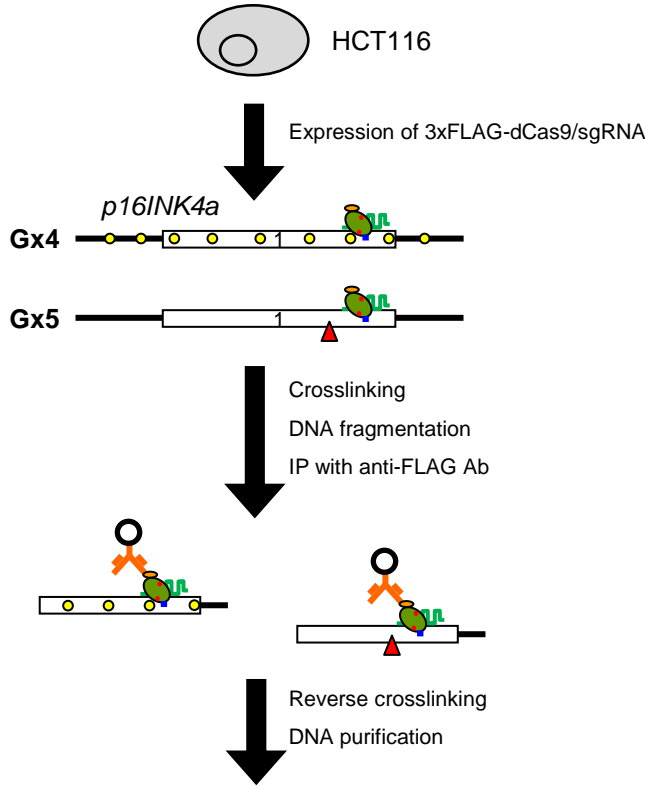

Bisulfite treatment and Methylation-Specific PCR (MSP)

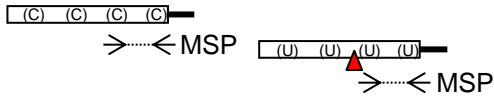

b

cgcgaggaaggaaacggggcgggggcgggatttctttttaacagagtgaacgcactcaaacacgcctt  
 tgc tggcaggcgggggagcggcggc tgggagcagggaggcgggagggcgggtg tggggggcagggtgggga  
 ggagcccagtcctcctccttgc caacgc tggc tctggcgagggtcgtctcggc tgggtgccccggg  
 ggagaccaacctggggcgacttcagggtgcccacattcgc taagtgtcggaggttaatagcacctcc  
 tccgagcactcgc tccggcgtcccttgcctggaaaga taccgggtccctccagagga tttgaggg  
 acagggtcggagggggc tcttccgcagcaccggaggaagaaagaggaggggctggc tggtcaccaga  
 ggg tggggcgga cgcgtgcgc tggcggc tgggagagggggagagcaggcagcggg cggcggggag  
 cagca tggagcggcggcggggagcagca tggagcctcggc tgaactggc tggcca cggcgcgggccc  
 GGGTcgggtagaggagg tgcggcgc tgc tggaggcggggggc tgc ccaacgcaccgaatagttac  
 ggtcggaggccga tccagggtgggtagagggtc tgcagcgggagcagggga tggcgggcgactc tggag  
 gacgaagt ttcaggggaattggaa tcaggtagcgcctcga ttc tccggaaaaaggggagggttctctg

c

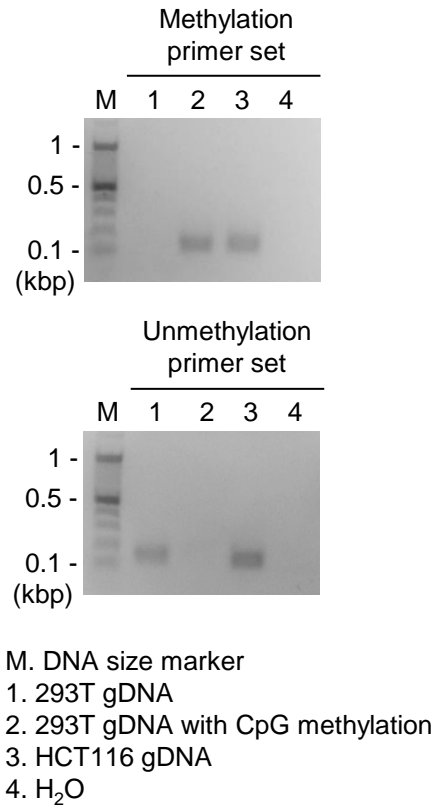

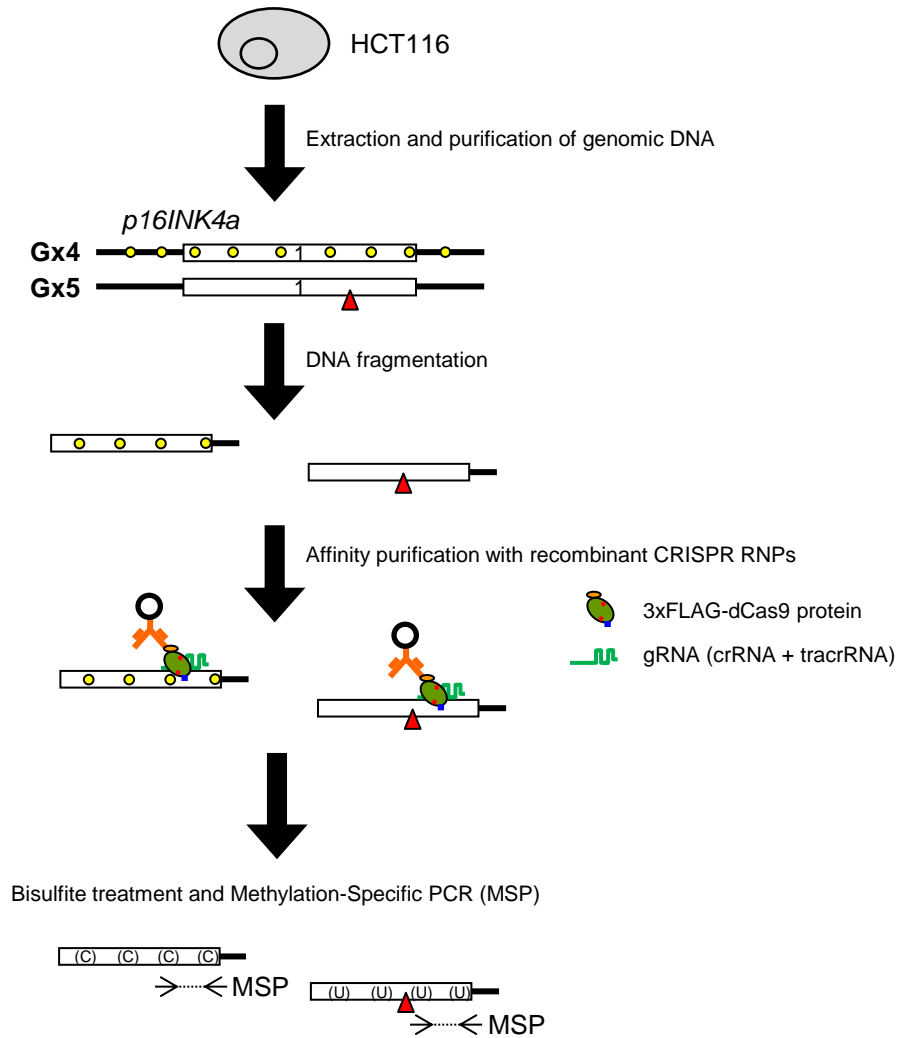

Supplementary Figure S4

a

```
...ctccggcagcccttcccgctgcgcagggctcagagccgttccgagatcttgagggtccggg
tgggagtggggggtgggggtgggggtgaaagtggggggcgggcgcgctcaggaaggcggg
tgcgcgcctgcggggcgagatgggcagggggcggtgctgggtcccagctcgcagttaagggg
caggagtggcctgctcacctctggtgccaagggcgggcagcggctgcgagctcggccctgg
aggcggcgagaacatggtgcgcaggttcttggtgaccctccggattcggcgcgcgtgcccgc
cgcgagtgagggttttcgtggttcacatcccgcggctcacGGGGGagtgggcagccagggggc
ccgcgcgctgtggccctcgtgctgatgctactgaggagccagcgtctagggcagcagccgcttcc
tagaagaccaggtaggaaggccctcgaaaagtccggggcgattcg
```

b

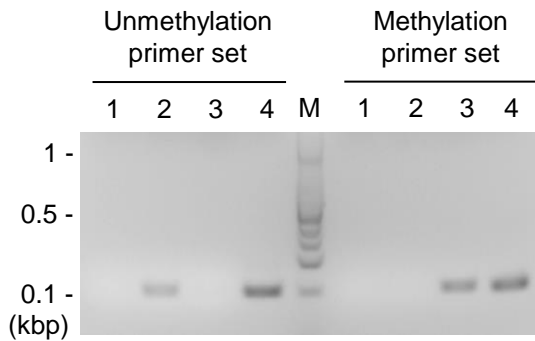

M. DNA size marker  
1. H<sub>2</sub>O  
2. 293T gDNA  
3. 293T gDNA with CpG methylation  
4. HCT116 gDNA

Supplementary Figure S5

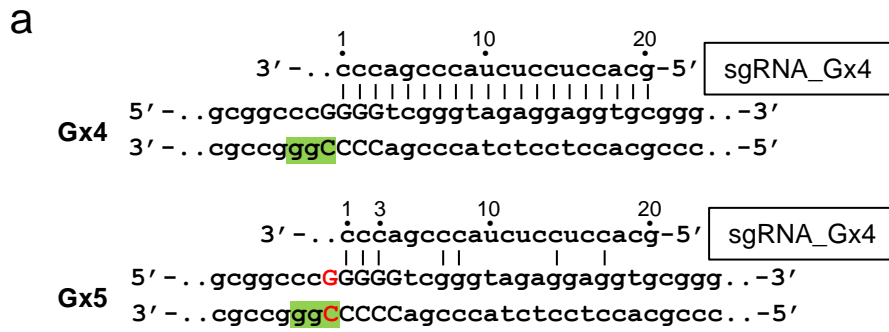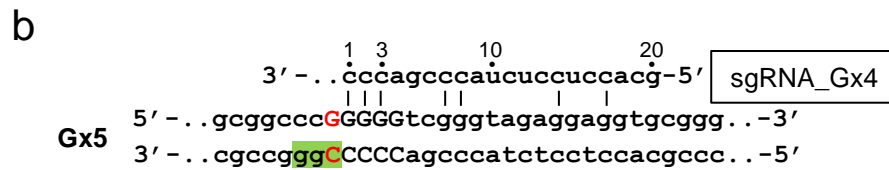

↓ single nucleotide skipping

at the 1-base 5' to PAM

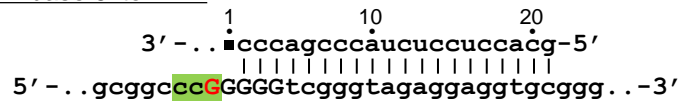

at the 2-base 5' to PAM

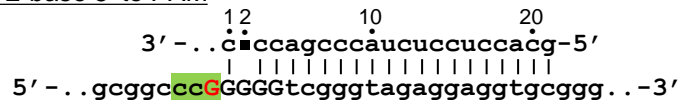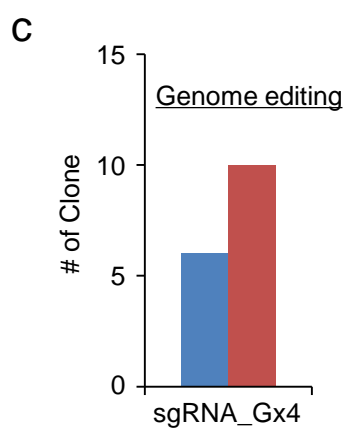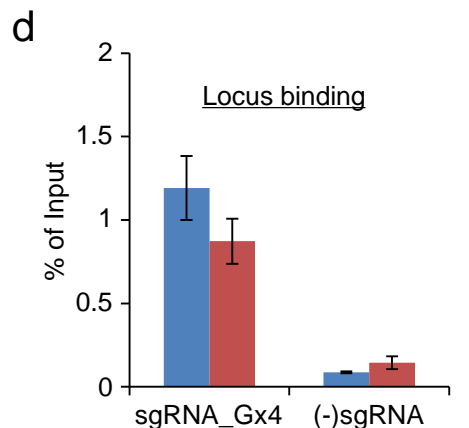

■ Gx4 (CpG-methylation) ■ Gx5 (non-CpG-methylation)

Supplementary Figure S6

a

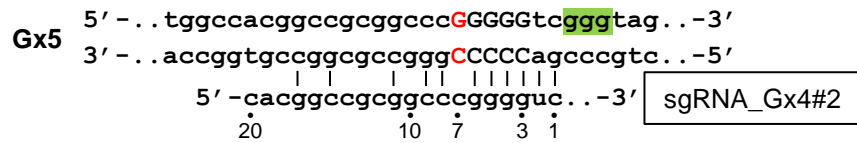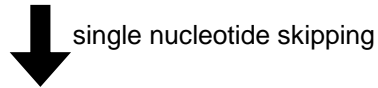

at the 3-base 5' to PAM

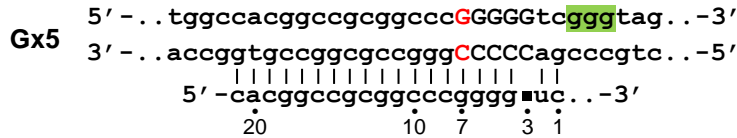

at the 7-base 5' to PAM

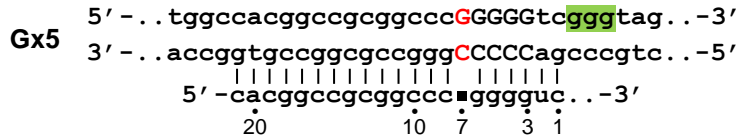

b

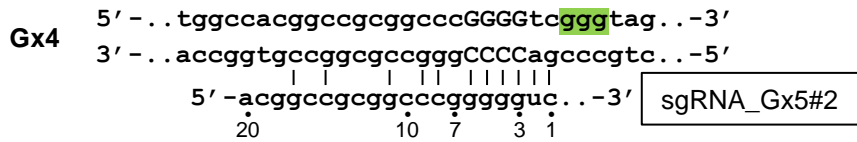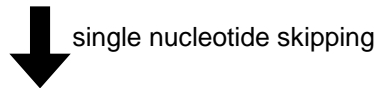

at the 3-base 5' to PAM

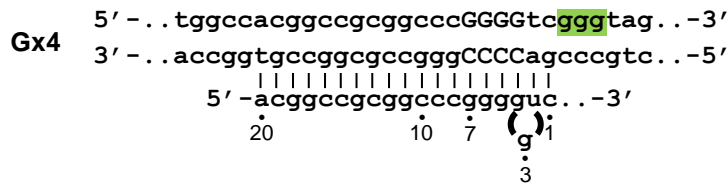

at the 7-base 5' to PAM

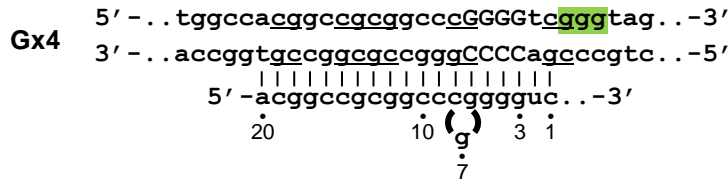

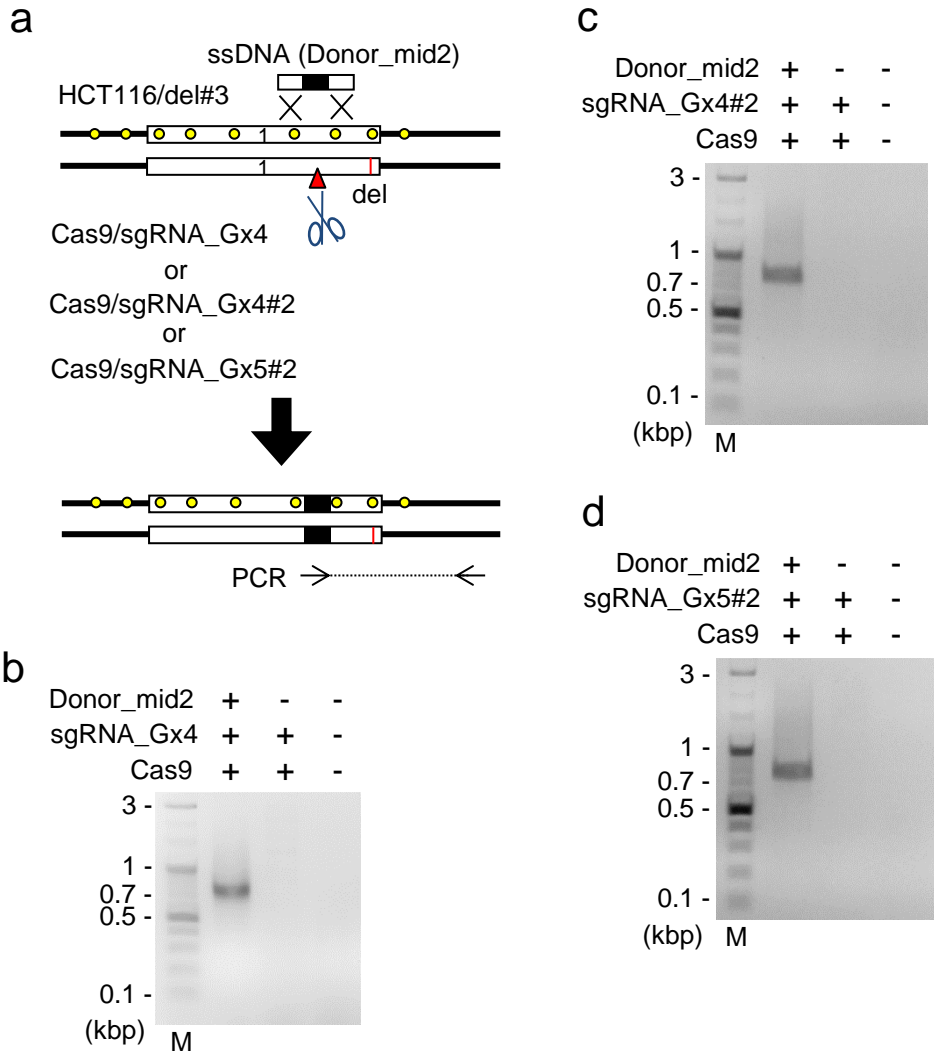

Supplementary Figure S8

cgg as PAM

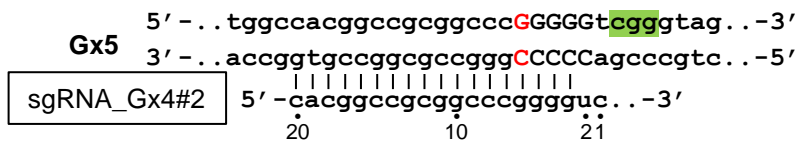

## Supplementary Figure S9
